# Supplementary material for: A prequel to the Dantean Anomaly: the precipitation seesaw and droughts of 1302 to 1307 in Europe
Source: Copernicus journal article supplement (doi:10.5194/cp-16-2343-2020), 2020-11-25
Supplement: Supplementary file 1 [file cp-16-2343-2020-supplement.zip]

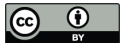

## *Supplement of*

# **A prequel to the Dantean Anomaly: the precipitation seesaw and droughts of 1302 to 1307 in Europe**

**Martin Bauch et al.**

*Correspondence to:* Martin Bauch ([martin.bauch@uni-leipzig.de](mailto:martin.bauch@uni-leipzig.de))

- [cp-16-2343-2020-supplement-title-page.pdf](#)
- [Supplementary Information 1 - Climate and Drought Indices.xlsx](#)
- [Supplementary Information 2.pdf](#)

The copyright of individual parts of the supplement might differ from the CC BY 4.0 License.
