# Supplementary material for: A prequel to the Dantean Anomaly: the precipitation seesaw and droughts of 1302 to 1307 in Europe
Source: Copernicus journal article supplement (doi:10.5194/cp-16-2343-2020), 2020-11-25
Supplement: Supplementary file 2 [file cp-16-2343-2020-supplement.zip]

## Source quotes from Central Europe and Eastern France 1300-1307

| Date        | Location                            | Event                     | Source quote                                                                                                                                                                                                                                                                                                                                                                                         | Taken from:                                                                                             | Annotations |
|-------------|-------------------------------------|---------------------------|------------------------------------------------------------------------------------------------------------------------------------------------------------------------------------------------------------------------------------------------------------------------------------------------------------------------------------------------------------------------------------------------------|---------------------------------------------------------------------------------------------------------|-------------|
| 1300        | Bavaria                             | Cattle plague             | <i>Hoc anno maxima pestilentia animalium et maxime vaccarum per totum mundum suborta est.</i>                                                                                                                                                                                                                                                                                                        | Pertz 1852, p. 6                                                                                        |             |
| 1300        | Silesia                             | Tempest                   | <i>Eodem anno tempestas fuit magna.</i>                                                                                                                                                                                                                                                                                                                                                              | Bielowski 1878a, p. 186                                                                                 |             |
| 1302 Jan 24 | Alsace                              | Cold spell<br>Mild winter | <i>Nono Kalendas Februarii et sequenti die perierunt vinee et magna pars frumenti et multa alia , et non fuit frigus ista hyeme nisi hiis diebus prenomatis.</i>                                                                                                                                                                                                                                     | Jaffé 1861, p. 227                                                                                      |             |
| 1302        | Alsace                              | Cool summer<br>Hot spell  | <i>et non fuit calor estate sequenti nisi duobus diebus , et hiis fuerunt duo homines prope Rubiacam calore nimio suffocati.</i>                                                                                                                                                                                                                                                                     | Jaffé 1861, p. 227                                                                                      |             |
| 1302 summer | Bresse                              | Flood (Ain)               | <i>De 27 meit siligis redditu de exitu molendinui Pontis Vallis quod molendum propter inundationes aquarum vacavit 27 septimani.</i>                                                                                                                                                                                                                                                                 | Arch. Dep. Côte d'Or, B 9158 (compte de la châteltenie de Pont-de-Vaux du 9 mars 1302 au 25 avril 1303) |             |
| 1302 Aug    | Basel, Breisach, Colmar, Strasbourg | Flood of the Rhine        | <i>Per totum Augustum fuit inundatio aquarum; in Basilea pontem pro parte destruxit, columnam fontis transivit, dorsa equorum in stabulis, magnum incommodum intulit; a Nuwenburg naves usque Friburgum transferebat; in Brisaco montem circuevit, claustrum penetravit; in Argentina pisces in cellariis et stubis capiebantur; in Alsatia flumina messem impederunt, quod metere non valebant.</i> | Jaffé 1861, p. 227                                                                                      |             |
| 1302 Aug 4  | Breisach, Basel, Strasbourg         | Flood of the Rhine        | <i>In vigilia sancti Oswaldi regis, sive festo sancti Dominici Rhenus inundavit, pontem Rheni lesit, pontem Brisacensem destruxit, montem Augga [Eggersberg] circumdedit, claustrum sororum ordinis Cisterciensium [Marienau near Breisach] replevit,</i>                                                                                                                                            | Jaffé 1861, pp. 226-227                                                                                 |             |

## Supplementary Information 2: Documentary data 1300-1307

| Date          | Location | Event                                          | Source quote                                                                                                                                                                                                                                                                                                                                                                                                                                                                                                                                                                                     | Taken from:              | Annotations |
|---------------|----------|------------------------------------------------|--------------------------------------------------------------------------------------------------------------------------------------------------------------------------------------------------------------------------------------------------------------------------------------------------------------------------------------------------------------------------------------------------------------------------------------------------------------------------------------------------------------------------------------------------------------------------------------------------|--------------------------|-------------|
|               |          |                                                | <i>messem frumenti devastavit, et maximum damnum in Brisaca pauperibus inferebat. In Argentina Renus intravit cellaria multorum, et unus ex civibus lucium magnum in suo cellario comprehendit. In Basilea eodem tempore Rhenus equorum stabula introivit, eorum dorsa undis maximis perfundebat. [...] Inundatio Rheni tanta fuit, quod homines de Nuwenburch [probably Neuenburg/Rhein] in Friburgum navigio potuerunt pervenire, quod usque ad illud tempus fuerat inauditum.</i>                                                                                                             |                          |             |
| 1302<br>Sep 1 | Alsace   | Frost<br>Flood                                 | <i>In festo sancti Egidii pruina cecidit in montibus Alsatie, que plurimum vinea... Inundatio Rheni tanta fuit, quod homines de Nuwenbruch in Friburgum navigio potuerunt pervenire, quod usque ad illud tempus fuerat inauditum.</i>                                                                                                                                                                                                                                                                                                                                                            | Jaffé 1861, p. 226       |             |
| 1302          | Alsace   | Bad grape harvest<br>Acidic and expensive wine | <i>Acre vinum atque debile noscitur crevisse , et circa festum sancti Martini quartale pro duobus solidis vendebatur ; vinum vero vetus pro 32 denariis vix poterat comparari . Dominus abbas Parisiensis 80 vasa optimi sui vini pro octingentis libris emptoribus exhibebat. [...] In Columbaria quartale vini pro 4 solidis vendebatur. In Westhusen carrata vini pro centum libris tali condicione vendebatur , ut una libra annis singulis solveretur . Eadem carrata data fuit pro 20 libris. Tercia vice fuit data pro vinea, de qua due libre denariorum annis singulis solvebantur.</i> | Jaffé 1861, p. 227       |             |
| 1302          | Austria  | Bitter wine                                    | <i>Eodem anno ex intemperie aeris vina Austrie communiter in tanta sunt procreata amaritudine, ut nullus retroactis temporibus a quoquam sub simili acerbitate procreata tam generaliter recordaretur.</i>                                                                                                                                                                                                                                                                                                                                                                                       | Wattenbach 1851a, p. 660 |             |
| 1302          | Mainz    | Bitter wine                                    | <i>Item eodem anno amarum et miserum vinum crevit.</i>                                                                                                                                                                                                                                                                                                                                                                                                                                                                                                                                           | Pertz 1861, p. 3         |             |

## Supplementary Information 2: Documentary data 1300-1307

| Date                                         | Location        | Event                                                                                 | Source quote                                                                                                                                                                                                                                                                                                                                                                                                                                                                                                                                                                                                                                                                                                                                                                                                                         | Taken from:            | Annotations |
|----------------------------------------------|-----------------|---------------------------------------------------------------------------------------|--------------------------------------------------------------------------------------------------------------------------------------------------------------------------------------------------------------------------------------------------------------------------------------------------------------------------------------------------------------------------------------------------------------------------------------------------------------------------------------------------------------------------------------------------------------------------------------------------------------------------------------------------------------------------------------------------------------------------------------------------------------------------------------------------------------------------------------|------------------------|-------------|
| 1302<br>Dec 8 –<br>Dec 21 –<br>1303 Jan<br>6 | Alsace<br>Doubs | Cold spell<br>Freezing rivers (Rhine,<br>Doubs)<br>Low water levels<br>(Rhine, Doubs) | <i>Circa festum sancte Lucie venit frigus tollerabile. Circa festum sancti Thomae venit frigus magnum, quod pauperes plurimum perturbavit et permansit usque post epiphaniam. Hoc frigus terram fidit et sacramentum dominicum in calicibus congelavit. Circa Bisuncium fluvius Dubius congelatus fuit et homines glaciem ascenderunt et glacies sub eis fregit et homines promiscui sexus quingenti pariter perierunt in die sancti Stephani. Hoc anno aquarum exstitit inundatio et Renus fluvius tante magnitudinis extitit, quod nullus hominum recordabatur, eum tante magnitudinis extitisse. In hyeme vero tante parvitatis erat, quod nullus hominum recordabatur, eum tante parvitatis suis temporibus extitisse.</i>                                                                                                       | Jaffé 1861, p. 228     |             |
| 1302<br>Dec 24 –<br>1303 Jan                 | Ile-de-France   | Cold spell<br>Animals killed<br>Freezing rivers                                       | <i>La nuit de Nouel en cel an / Fist-il se tres grant froit a pan / Que vins gelèrent es toniax. / Cel an moururent les agniax / Brebis et autres bestes grosses / Es chans et es tas et es fossés / Et es villes et par dehors / Et en leur lit trouvoit on mort / Les gens par angoisse de froit. / Et partout tant de nef avoit / Qu'oncques mès tant n'en fu trouvée / Toute riviere fut gelée / par-dessus sentiers et chemins / Où l'en charioit blez et vins / Et quant ce vint au desgeer / Que glaçons convint charier, / Tout ce que devant elle trouvoit / Versoit outre et trebuchoient. / Lors fu maintes grant nef partie / Et mainte autre marchandise / Sans metre ne fere requeuvre. / Oncques mes l'en ne vit tele euvre / Dont marcheans deseritez / Furent du leur, c'est veritez / Et demourèrent orphelin.</i> | Buchon 1827, pp. 64-65 |             |
| 1302/03<br>winter                            | Breisach        | Freezing river (Rhine)                                                                | <i>In Brisaco Renus congelebatur, quod canes in glacie poterant pertransire.</i>                                                                                                                                                                                                                                                                                                                                                                                                                                                                                                                                                                                                                                                                                                                                                     | Jaffé 1861, 228        |             |

## Supplementary Information 2: Documentary data 1300-1307

| Date           | Location   | Event                                   | Source quote                                                                                                                                                                                                                                                                                                                                                                                                                                                                                                                                                    | Taken from:                                  | Annotations                                               |
|----------------|------------|-----------------------------------------|-----------------------------------------------------------------------------------------------------------------------------------------------------------------------------------------------------------------------------------------------------------------------------------------------------------------------------------------------------------------------------------------------------------------------------------------------------------------------------------------------------------------------------------------------------------------|----------------------------------------------|-----------------------------------------------------------|
| 1302/03 winter | Silesia    | Very mild winter                        | <i>Habita fuit yemps estivalis, quod homines nullum frigus senserunt.</i>                                                                                                                                                                                                                                                                                                                                                                                                                                                                                       | Arndt 1866 (Annales Wratislavienses), p. 529 |                                                           |
| 1302/03 winter | Russia     | Mild winter, no snow<br>Dearth of grain | <i>The winter of the same year was a warm winter; there was no snow all through the winter. The people could not get corn, and prices were very high, great hardship and distress fort he people. But we despair not of Thy mercy; correcting, punish us, Lord, but give us not over to death; for though we have sinned, yet have we not drawn away from Thee; having punished us, have mercy on us. O Lord, that lovest mankind not according to our wicked works, but according to Thy great mercy. Thou art our God, and we know no other God but Thee.</i> | Michell/Forbes 1914, p. 115                  |                                                           |
| 1303 Apr 25    | Alsace     | Cold spell                              | <i>Item flores herbarum plurimi prodierunt. Eadem die perierunt vinee et botri in saccis ad propria portabantur 1258. Item ipso die fraga recentia videbantur.</i>                                                                                                                                                                                                                                                                                                                                                                                              | Jaffé 1861, p. 228                           |                                                           |
| 1303 May 1     | Saxonia    | Snowfall destroys harvest               | <i>Anno milleno trecento quoque trino Philippi festo nivis venti memor esto Et marcescentes segetes facte virentes.</i>                                                                                                                                                                                                                                                                                                                                                                                                                                         | Pertz 1859, p. 44                            |                                                           |
| 1303 Jun 11    | Silesia    | Hailstorm                               | <i>Anno Domini 1303 translatione sancti Benedicti turbato aere magnus grando cecidit in modum unius ovi, ac etiam in aliquibus locis inventi sunt multu maiores hiis, utpot in modum capitis unius pueri.</i>                                                                                                                                                                                                                                                                                                                                                   | Bielowski 1878b, p 708                       | Non-contemporary: written in the 15 <sup>th</sup> century |
| 1303 summer    | Winterthur | Thunderstorm<br>Flood                   | <i>Citra idem tempus tempore estivali quedam nubes grandis et aquosa nimis ultra Wintertur apparens resoluta fuit et alluvium rapidissimum et valde ingens procreavit. Et contra Wintertur impetuose fluens cunctos terre fructus sibi occurentes et inventos devastavit, homines de planiciebus fugavit et ad montes ascendere coegit, arbores radicitus</i>                                                                                                                                                                                                   | Baethgen 1924, p. 55                         |                                                           |

## Supplementary Information 2: Documentary data 1300-1307

| Date                  | Location    | Event                                                                | Source quote                                                                                                                                                                                                                                                                                           | Taken from:                | Annotations |
|-----------------------|-------------|----------------------------------------------------------------------|--------------------------------------------------------------------------------------------------------------------------------------------------------------------------------------------------------------------------------------------------------------------------------------------------------|----------------------------|-------------|
|                       |             |                                                                      | <i>evulsit ac subvertit et in una arbore mulierem deprehensam quandam, que ipsam scandendo ascenderat, ut aque inpetum furiose effugeret, infra Wintertur ad villam unam vocatam Wulfingen devexit. Fossata vero oppidi Wintertur, vicos et plateas, replevit. Et tandem evanuit.</i>                  |                            |             |
| 1303/04 winter        | Alsace      | Mild winter                                                          | <i>Hiemps calida.</i>                                                                                                                                                                                                                                                                                  | Jaffé 1861, p. 230         |             |
| 1303/04 winter        | Mainz       | Mild winter, no frost                                                | <i>Item 1304, nullum frigus compertum est per totam hyemem.</i>                                                                                                                                                                                                                                        | Pertz 1861, p. 3.          |             |
| 1303/04 winter        | Bohemia (?) | Cold winter<br>Famine (?)                                            | <i>Rex eciam Romanorum Albertus [...] Bohemiam ingressus, incendiis et rapinis cuncta devastans, ibidem duravit, quosque yemis asperitate et famis necessitate reddire ad propria compelleretur.</i>                                                                                                   | Wattenbach 1851b, p. 733   |             |
| 1303/04 winter        | Bohemia (?) | Cold winter                                                          | <i>Anno Domini 1304 Albertus Romanorum rex circa festum Michahelis cum magno exercitu intravit Bohemiam contra Wenzeslaum regem; sed nichil profecit, quia propter instantiam hiemis ipsum de terra sine fructu recedere oportebat.</i>                                                                | Wattenbach 1851c, p. 752   |             |
| 1303/04 winter        | Bohemia (?) | Cold winter                                                          | <i>Rex Romanorum collecto exercitu Boemiam intravit [...]. Cum vero ante montes, quos vulgariter Kuthin vocant, venisset et totam Boemiam variis cladibus opprimeret, supervenientis hiemis asperitate et victus inopia regredi est compulsus, proponens futuro anno expeditionem iterare.</i>         | Holder-Egger 1899a, p. 327 |             |
| 1304 spring to summer | Alsace      | Hot and dry weather<br>No rain<br>Early harvest<br>Good wine harvest | <i>Annus hic calidus fuit et nullus hominum recordabatur, annum tante caliditatis extitisse. Messis ante Iohannis inchoata et ante tres consumata. Botri maturi in vigilia sancti Iohannis in Alsatia videbantur. Tantis calor in Alsatia erat, quod senes communiter dixerunt, nullum annum tante</i> | Jaffé 1861, p. 230         |             |

## Supplementary Information 2: Documentary data 1300-1307

| Date                 | Location      | Event                                                                                                                                                                                               | Source quote                                                                                                                                                                                                                                                                                                                                                                                                                                                                                                                                                                                                                                                                                                                                           | Taken from:          | Annotations |
|----------------------|---------------|-----------------------------------------------------------------------------------------------------------------------------------------------------------------------------------------------------|--------------------------------------------------------------------------------------------------------------------------------------------------------------------------------------------------------------------------------------------------------------------------------------------------------------------------------------------------------------------------------------------------------------------------------------------------------------------------------------------------------------------------------------------------------------------------------------------------------------------------------------------------------------------------------------------------------------------------------------------------------|----------------------|-------------|
|                      |               |                                                                                                                                                                                                     | <i>caliditatis suis temporibus evenisse. Annus sine pluvia et calidus; et bonum vinum crevit, quod loqui fecit pauperes per talenta 10. Vinee montium vinum bonum in maxima quantitate protulerunt.</i>                                                                                                                                                                                                                                                                                                                                                                                                                                                                                                                                                |                      |             |
| 1304<br>Mar –<br>Jul | Ile de France | Thunderstorms                                                                                                                                                                                       | <i>In vere et aestate, in multis locis Francie, graves et dampnosae tempestates fuerunt. Nam a lapidibus grandinis de aere cadentibus in pluribus partibus regni, maxime in Junio et Julio, segetes cum granis et cum uvis vineae sunt protratae et vastatae. Maximaque illo anno caristia fuit frugum, ita quod sextarium frumenti centum solidis Parisiensibus et amplius mense martio vendebatur : unde pauperes maximam penuriam pertulerunt.</i>                                                                                                                                                                                                                                                                                                  | Bouquet 1855, p. 644 |             |
| 1304<br>summer       | Mainz         | Dry and hot weather<br>Rhine falling dry<br>Fountains dry out<br>Good wine harvest                                                                                                                  | <i>Quam hyemem secuta est aestas sine omni pluvia et tantae siccitatis, quod ad fundum Renus et putei decreverunt.<br/>Et hoc anno crevit vinum tam nobile, quod vinum ignobile praeferebatur vino nobilem vinearum.</i>                                                                                                                                                                                                                                                                                                                                                                                                                                                                                                                               | Pertz 1861, p. 3.    |             |
| 1304<br>summer       | Alsace        | Hot summer<br>Water mills falling dry<br><br>No rainfall<br>Good wine harvest<br>Good grain harvest,<br>but dearth due to a<br>lack of milling capacity<br><br>Very low water level<br>of the Rhine | <i>In Alsatia tantus erat calor, quod carrucarii nudi per campos bigas suas cum oneribus deduxerunt. Tantus fuit calor, quod rivus volvens duas rotas solam vix molendine volvere dicebatur. Panis modicus pro denario dabatur et frumentum pro 5 vel 6 solidis vendebatur. Annus hic calidus, clarus, sine notabili pluvia, vinum protulit bonum in montibus et magna quantitate, et ubi credebat se quis vas aut tria replere, quinque faciliter adimplevit. In quibusdam vero locis campestria vinum debile ac modicum protulerunt. Quartale frumenti pro 5 vel 6 solidis vendebatur, sed panis modicus pro denario dabatur. Si enim pro 12 solidis frumentum venditum fuisset, panis nimis extitisset. Ideo panis modicus erat, quia molendina</i> | Jaffé 1861, p. 230   |             |

## Supplementary Information 2: Documentary data 1300-1307

| Date                         | Location         | Event                                                            | Source quote                                                                                                                                                                                                                                                                                                                                                    | Taken from:                            | Annotations                                                                                                                                                             |
|------------------------------|------------------|------------------------------------------------------------------|-----------------------------------------------------------------------------------------------------------------------------------------------------------------------------------------------------------------------------------------------------------------------------------------------------------------------------------------------------------------|----------------------------------------|-------------------------------------------------------------------------------------------------------------------------------------------------------------------------|
|                              |                  |                                                                  | <i>frumenta molere non valebant. Vinum bonum abundabatur ac pro parvo precio dabatur, quia Rhenus vinum deducere non valebat. Rhenus tante parvitatatis erat, quod in locis pluribus inter Argentinam et Basileam poterat transvadari.</i>                                                                                                                      |                                        |                                                                                                                                                                         |
| 1304                         | Neuenburg, Krems | Dry period, Danube river falling dry on large parts in Austria   | <i>Eo etiam anno Danubius ariditate nimia ita inaruerat, ut inter Neunburgam et Chremsam in tribus locis vadabilem equis et curribus se preberet.</i>                                                                                                                                                                                                           | Wattenbach 1851a, p. 662, 1            | According to Kiss 2017, p. 9 maybe not perfectly reliable, as the event was mentioned in the context of the coronation of King Wenceslaus in Hungary, happening in 1301 |
| 1304<br>Nov 20               | Erfurt           | Thunderstorms<br>People dying                                    | <i>Eodem anno XII. Kalen. Decembris audita sunt tonitrua, visa fulgura, magna tempestas facta est hora vesperarum, ita ut multi perirent vi tempestatis.</i>                                                                                                                                                                                                    | Holder-Egger 1899a, p. 326             |                                                                                                                                                                         |
| 1304/<br>1305<br>winter      | Alsace           | Long winter, cold<br>Freezing birds<br>Low water levels of Rhine | <i>Hiemps diu duravit. Stramen ad commedendum ovibus et aliis pecoribus prebebatur. Ciconie et multe alie parve avicule fame et frigore perierunt. Rhenus naves oneratas portare non valebat pre nimia parvitate.</i>                                                                                                                                           | Jaffé 1861, p. 231                     |                                                                                                                                                                         |
| 1305 Jan 20                  | Cologne          | Rhine freezing over                                              | <i>In deme selven jaire ervrois der Rin, dat man dar over geink up sente Agneten avent (20. Jan.).</i>                                                                                                                                                                                                                                                          | Cardanus/Schröder 1876, Rec. A., p. 20 |                                                                                                                                                                         |
| 1305 Jan 21 –<br>1305 Mar 16 | Cologne          | Rhine freezing over                                              | <i>Circa idem tempus adeo ingens gelu tempore brumali in istis terris erat, vt renus ante Coloniam congelatus a festo s. Agnetis virginis (21.1.) ac martiris liberum hominibus preberet transitum inclusiue vsque ad festum s. Heriberti archiepiscopi Coloniensis. (16.3.) Nam cum collegia canonicorum in Colonia de mane per glaciem ad Tuitium ex more</i> | Eckertz 1870, p. 201                   |                                                                                                                                                                         |

## Supplementary Information 2: Documentary data 1300-1307

| Date                     | Location      | Event                               | Source quote                                                                                                                                                                                                                                                                                                                                  | Taken from:                            | Annotations |
|--------------------------|---------------|-------------------------------------|-----------------------------------------------------------------------------------------------------------------------------------------------------------------------------------------------------------------------------------------------------------------------------------------------------------------------------------------------|----------------------------------------|-------------|
|                          |               |                                     | <i>s. Heribertum visitaissent, eadem die glacies resoluta est et in tanto turbine ac impetu glacies a superioribus partibus descendens renum repleuerat, vt hominibus, qui illo in tempore a Colonia ad Tuitium venerant, penitus regressum per aliquod tempus denegaretur.</i>                                                               |                                        |             |
| 1305 Jan 21 -1305 Mar 16 | Cologne       | Rhine freezing over                 | <i>In dem selven jair op sente Angeneten dach, do vervroir der Rin zo Coellen zo, dat men darover geink, ind dat [is] stoint bis sent Herbertz dach [16. März], echt wechen lank.</i>                                                                                                                                                         | Cardanus/Schröder 1876, Rez. D, p. 129 |             |
| 1305                     | Cologne       | Famine and mortality                | <i>in deme selven jare was de grose duir zit, dat vil luits hungers sturven.</i>                                                                                                                                                                                                                                                              | Cardanus/Schröder 1876, Rec. A., 20    |             |
| 1305                     | Vienna        | Flooding (Danube and tributaries)   | <i>Eodem anno tanta inundatio facta est aquarum, ut aqua Wiennae hospitale civium et fontem ante hospitale situm transcenderet, ita ut infirmi in lectulis natarent et vix aufugere viderentur. Et rivus, qui Satlpach dicitur, ad Sanctam Crucem per totum claustrum et ante liberariam usque at gradum Ecclesiae intravit.</i>              | Pez 1721, col. 887                     |             |
| 1305 summer              | Ile de France | Dry period                          | <i>Aestivo tempore fuit in Francia siccitas magna valde.</i>                                                                                                                                                                                                                                                                                  | Daunou 1840, p. 592                    |             |
| 1305 summer              | Ile de France | Dry period<br>Fountains falling dry | <i>Hoc anno per totam aestatem maxima siccitas temporis fuit per totam Franciam, fuvique nimis constricti sunt et fontes, adeo quod in profundis puteis vix aque poterat inveniri.</i>                                                                                                                                                        | Bouquet 1855, p. 645                   |             |
| 1305 summer              | Ile de France | Tempest<br>City fires               | <i>En cele année moult venta / Dont maint meson adenta, / Mains arbres hors de leurs racines / Des jor huit dura cest vent et jor et nuit / Et par la doutance du vent / Estoit il crié moult souvent / Qu'à tous les huiz fust l'eve mise. / Cel an fu mainte ville esprise / de feu et le vent se faisoit / qui nuit et jour s'apesoit.</i> | Buchon 1827, pp. 116-117               |             |



## Supplementary Information 2: Documentary data 1300-1307

| Date                     | Location                       | Event                                                      | Source quote                                                                                                                                                                                                                                                                                                                                                                    | Taken from:                                                      | Annotations                                                                                                 |
|--------------------------|--------------------------------|------------------------------------------------------------|---------------------------------------------------------------------------------------------------------------------------------------------------------------------------------------------------------------------------------------------------------------------------------------------------------------------------------------------------------------------------------|------------------------------------------------------------------|-------------------------------------------------------------------------------------------------------------|
|                          |                                |                                                            | <i>/ Le miey d'Aucoin et d'Ennevers / en fut lors ars et mis envers.</i>                                                                                                                                                                                                                                                                                                        |                                                                  |                                                                                                             |
| 1305<br>Aug 10           | Steiermark                     | Tempest                                                    | <i>Anno Domini MCCCIV circa festi beati Laurencii tantus ventus ortus est in Stiria qui multas fortissimas arbores funditus evertit cum radicibus.</i>                                                                                                                                                                                                                          | Zahn 1865, p. 27                                                 |                                                                                                             |
| 1305/06<br>winter        | Baltic sea                     | Sea ice cover                                              | <i>Anno Domini MCCCVI fuit hyems maxima ita quod mare inter Ölandiam et Gutlandiam et Estoniam extitit congelatum, et una foca fuit viuens inuenta apud ecclesiam Yskaleem.</i>                                                                                                                                                                                                 | Fant 1818, p. 33                                                 |                                                                                                             |
| 1305/06<br>winter        | Germany,<br>France, Baltic sea | Cold winter<br>Sea ice cover                               | <i>Tanta in Germania et Gallia frigora fuerunt, quanta in Norvegia solito maiora sunt. Tunc quidam de Rostochio in Daniam per fretum Codanum [super glacie] ambularunt. Glacies oceani quindecim ulnas acta per totam aestatem ad Islandiae borealis litora jacuit.</i>                                                                                                         | Langebek 1774, 127                                               |                                                                                                             |
| 1306<br>Feb 1            | Frankfurt                      | Ice drift on the river Main<br>Destruction of stone bridge | <i>Nota quod anno domini MCCCVI in vigilia purificationis beate Marie virginis gloriose (1. Feb.) circa noctem due turres pontis et ipse pons Frankenfordensis pro majori parte, multis utriusque sexus hominibus desuper stantibus, propter nimiam glaciem et aquarum inundacionem ceciderunt. Qui homines quasi ad quingentos estimati omnes pro tunc submersi perierunt.</i> | Froning 1884, p. 1                                               | Similarities with Cardanus/Schröder 1876, Rec. B pp 32-33 and Rec. D, p. 129; Kl. Limburger Annalen, p. 119 |
| 1306<br>spring to summer | Ile de France                  | Dry period<br>Bad harvest                                  | <i>Eodem anno, primo ver, post aestas fuerunt siccitate intemperata. Unde dampna terrae fructibus provenerunt.</i>                                                                                                                                                                                                                                                              | Bouquet 1855, p. 646                                             |                                                                                                             |
| 1306<br>summer           | Bresse                         | Warm summer                                                | <i>Item in stipendiis duodecim hominorum sarclendum herbas de dictis vineis quia non fuerant fosserato propter calorem.</i>                                                                                                                                                                                                                                                     | Arch. Dep. Côte d'Or, B 10150 (account roll of the castellany of |                                                                                                             |

## Supplementary Information 2: Documentary data 1300-1307

| Date              | Location               | Event                                          | Source quote                                                                                                                                                                                                                                                                                                                                                                                                                                                                                                                                                                                                                                       | Taken from:                           | Annotations                                                        |
|-------------------|------------------------|------------------------------------------------|----------------------------------------------------------------------------------------------------------------------------------------------------------------------------------------------------------------------------------------------------------------------------------------------------------------------------------------------------------------------------------------------------------------------------------------------------------------------------------------------------------------------------------------------------------------------------------------------------------------------------------------------------|---------------------------------------|--------------------------------------------------------------------|
|                   |                        |                                                |                                                                                                                                                                                                                                                                                                                                                                                                                                                                                                                                                                                                                                                    | Treffort, 1 Mar. 1306 to 2 Apr. 1307) |                                                                    |
| 1306/07           | Bohemia                | Famine                                         | <i>Sanguis eciam in diversis partibus multus effuses est et fames duobus annis non ex sterilitate terre sed ex malicia vastancium plus quam terciam partem hominum consumpsit.</i>                                                                                                                                                                                                                                                                                                                                                                                                                                                                 | Emler 1882, p. 478                    | value of the work is unfortunately decreased by mistakes in dating |
| 1306/07<br>winter | Ile de France<br>Paris | Freezing rivers<br>Floodings after they thawed | <i>Tempore hiemali, facta inundatione nimia fluvialium aquarum, antequam decrevissent adeo sunt fortiter congelatae, quod in locis pluribus damna multa postmodum exinde pervenerint. Impetu siquidem glacierum, post earum dissolutionem veloci labentium cursu, tam domus quam pontes molendinaque quamplurima corruerunt. Tunc etiam Parisius in portu Graviae naves multae diversis oneratae mercaturis, cum cunctis in eisdem confractae perierunt.</i>                                                                                                                                                                                       | Daunou 1840, p. 355                   |                                                                    |
| 1306/07<br>winter | Ile de France<br>Paris | Freezing rivers<br>Floodings after they thawed | <i>Hoc etiam anno tempore hyemis, fluminibus Franciaie inundantibus aquis geluque asperrimo congelante ipsas aquas, glacies, post modum dissoluta calore aeris vel solis, maximum in multis locis fecit detrimentum bonorum. Per frustorum enim glaciei violentiam domus, pontes, et molendina quae erant super aquas vel juxta, conquassata sunt penitusque destructa. Parisius quoque in Gravia naves plures, vino et ceteris bonis onustae, cum eis quae intus erant, ex cursus aquae violentia, cum glaciei frustis omnia scindentibus, sunt perditae penitus et confractae. Unde plurimi mercatores alienigenae sunt multum dampnificati.</i> | Bouquet 1855, p. 647                  |                                                                    |

## Supplementary Information 2: Documentary data 1300-1307

| Date                                          | Location              | Event                                                             | Source quote                                                                                                                                                                                                                                                                                                                                                                                                                                               | Taken from:                | Annotations |
|-----------------------------------------------|-----------------------|-------------------------------------------------------------------|------------------------------------------------------------------------------------------------------------------------------------------------------------------------------------------------------------------------------------------------------------------------------------------------------------------------------------------------------------------------------------------------------------------------------------------------------------|----------------------------|-------------|
| 1306/07<br>winter                             | Bohemia,<br>Nuremberg | Cold winter<br><br>Military retreat                               | <i>Et dum nocivae hyemis instaret violentia et Rex cum suis nimia victualium urgeretur inopia, opportunius tempus expectare volens, ad urbem Noricorum, relinquens Bohemiam, properavit.</i>                                                                                                                                                                                                                                                               | Pez 1721, col. 890         |             |
| 1306/07<br>winter                             | Bohemia               | Cold winter<br><br>Military retreat                               | <i>[...] et Albertus rex anno Domini 1307 intrat Bohemiam cum gravi exercitu ad subiugandum regnum pueris suis. Sed iterum propter instantiam hyemis, remanentibus in devotione sua Praga et aliis munitionibus et baronibus, qui se antea sibi subdiderant, abinde sine ulteriori fructu recedere cogitur.</i>                                                                                                                                            | Wattenbach 1851c, p. 752   |             |
| 1306/07<br>winter,<br>after<br>1306 Oct<br>16 | Austria               | Cold winter                                                       | <i>[...] umme sente Gallentag.<br/>Da daz geschach, da zouch konig Albrecht von Beheim unde zouch in daz Ostirlant wedir Frederichen, des alden lancgrefen son. Da was der winter also kalt, daz si herabe muesten zihen.</i>                                                                                                                                                                                                                              | Holder-Egger 1899b, p. 473 |             |
| 1307<br>Apr                                   | Ile de France         | Cold spell<br>Damages on grapes<br>Mortality                      | <i>L'année mil trois cens et sept / en avril fist il si grant froit / que vigne et borgeons gelèrent / Ne riens cel an ils ne porterent / Dont maintes lors l'eaue burent / qui puis en septembre moururent / ains en fust la veritez / Si en fu la mortalité / En cel an sur les hommes grant.</i>                                                                                                                                                        | Buchon 1827, p. 130        |             |
| 1307                                          | Bohemia               | Dry period<br>No rain<br>Bad harvest<br>Trees desiccate<br>Famine | <i>Eodem anno facta est in Bohemia et in Moravia et confinibus earum propter defectum pluvie ariditas magna terre, cuius causa perierunt universa semina tam hiemalia quam estivalia, arbores quoque tam domestice quam silvestres perierunt et in fructibus defecerunt; tam amara fames invaluerat, quod sibi de herbis terre variis nature humane inconsuetis extrema pauperum necessitas ac mortalis egestas, utcunque poterat, alimoniam faciebat.</i> | Emler 1884a, p. 111        |             |

## Supplementary Information 2: Documentary data 1300-1307

| Date                      | Location            | Event                                  | Source quote                                                                                                                                                                                                                                                                                                                                | Taken from:                                                                                                | Annotations            |
|---------------------------|---------------------|----------------------------------------|---------------------------------------------------------------------------------------------------------------------------------------------------------------------------------------------------------------------------------------------------------------------------------------------------------------------------------------------|------------------------------------------------------------------------------------------------------------|------------------------|
| 1307                      | Bohemia,<br>Moravia | Dry period<br>Bad harvest<br>Famine    | <i>Eodem anno fuit siccitas magna, ita quod semina et fructus perierunt, et magnus fuit victualiam defectus.</i>                                                                                                                                                                                                                            | Emler 1884b, p. 371                                                                                        |                        |
| 1307<br>spring/s<br>ummer | Bohemia,<br>Moravia | Dry period<br>Bad harvest<br>Famine    | <i>Eodem anno fuit siccitas magna, ita quod semina et fructus perierunt et magnus fuit victualiam defectus.</i>                                                                                                                                                                                                                             | Emler 1884c, p. 466                                                                                        | Depends on Emler 1884a |
| 1307<br>summer            | Bresse              | Heatwave                               | <i>In sarclenda dictis vineis de erbis quia propter calorem non potuerunt tercia vice fosserati.</i>                                                                                                                                                                                                                                        | Arch. Dep. Côte d'Or, B 10150 (account roll of the castellany of Treffort, 2 Apr. 1307 to 13 Mar. 1307)    |                        |
| 1307<br>autumn            | Bresse              | Flooding<br>Destruction of water mills | <i>16 meit frumentum redditu de firma molendini domini per extimationem castellani finienda ad feste beati bartholomei anno 1307 – dicit tamen castellanus quod a festo beati Bartholomei anno 1307 usque ad finem huius computi nichil valuit dictum molendinum quia molere non potuit dictum molendinum propter inundationes aquarum.</i> | Arch. Dep. Côte d'Or, B 9160 (account roll of the castellany of Pont-de-Vaux, 1 Mar. 1307 to 8 Febr. 1308) |                        |

## Source quotes from Northern and Central Italy and 1300-1307

| Date        | Location | Event                                            | Source quote                                                                                                                                                                                                                                                                                                                                                                                                                                                                                                                                                                                                                                                                                     | Taken from:                   | Annotations                   |
|-------------|----------|--------------------------------------------------|--------------------------------------------------------------------------------------------------------------------------------------------------------------------------------------------------------------------------------------------------------------------------------------------------------------------------------------------------------------------------------------------------------------------------------------------------------------------------------------------------------------------------------------------------------------------------------------------------------------------------------------------------------------------------------------------------|-------------------------------|-------------------------------|
| 1302<br>Feb | Ischia   | Vulcanic eruption<br>/ gases / ash rain          | <i>Nel detto anno MCCCII l'isola di Ischia, la quale è presso Napoli, gittò grandissimo fuoco per la sua solfaneria, per modo che gran parte dell' Isola consumò, e guastò infino al girone d'Ischia; e molte genti, e bestiame, e la terra medesima per quella pestilenza morirono e si guastarono. E molti per iscampare fuggirono a l'isola di Procita e a quella di Capri, e a terra ferma a Napoli, e a Baia, e a Pozzuolo, e in quelle contrade; e durò la detta pestilenza più di due mesi.</i>                                                                                                                                                                                           | Porta 1990, vol. 2, p. 87     |                               |
| 1302<br>Feb | Ischia   | Vulcanic eruption<br>/ gases / ash rain          | <i>Anno Domini MCCCII adhuc vivente Bonifacio papa istud mirabile apparuit in februario apud insulam Ischie, quia insignis virtute sulfuris et ventorum evaporavit de dicta insula, qui ascendit super aerem cum materia terrestri effuditque se super villam et combussit eam. Factaque est magna nebulositas per totam regionem, et mare repletum est lapidibus combustis ac consumpta terrestri substantia, quos pumices vocant natantes super aquam ratione suorum foraminum, que aerem continent, et propter consumptionem materie in ipsis facti sunt cineres in tanta multitudine et quantitate, ut eorum acervi quasi montes videbantur diffuderuntque se super mare ad CC miliaria.</i> | Clavuot 2009, p. 647          |                               |
| 1302        | Parma    | Dry period                                       | <i>Item eodem anno non venit pluvia aliqua per sex menses et plures.</i>                                                                                                                                                                                                                                                                                                                                                                                                                                                                                                                                                                                                                         | Bonazzi 1902, p. 84           |                               |
| 1302<br>Nov | Siena    | City fire<br>Infrastructure damage<br>Fire guard | <i>Fuoco grandissimo s'aprese in casa Saracini e de li Scotti, e bastò due dì e due notti; e fuvi a spegnare detto fuoco 214 maestri di pietra e di legname, e fé' gran danno ; e mendò</i>                                                                                                                                                                                                                                                                                                                                                                                                                                                                                                      | Lisini/Iacometti 1939, p. 265 | From the Guidoboni collection |

## Supplementary Information 2: Documentary data 1300-1307

| Date                | Location        | Event                                                                     | Source quote                                                                                                                                                                                                                                                                                                                                                                                                                                                                                                                                                              | Taken from:                                | Annotations                                                 |
|---------------------|-----------------|---------------------------------------------------------------------------|---------------------------------------------------------------------------------------------------------------------------------------------------------------------------------------------------------------------------------------------------------------------------------------------------------------------------------------------------------------------------------------------------------------------------------------------------------------------------------------------------------------------------------------------------------------------------|--------------------------------------------|-------------------------------------------------------------|
|                     |                 |                                                                           | <i>el comuno di Siena 1800 coppi d'aqua e mendò più case e ballatoi arsi di novembre. Fuoco grandissimo s'aprese nella casa di Giovannello di Ristoro forniere nel borgo a Sa' Mauritio, fé' gran danno; fuvì a spegnare 225 maestri di pietra e di legname, di novembre.</i>                                                                                                                                                                                                                                                                                             |                                            |                                                             |
| 1303<br>Jan-<br>Apr | Parma           | Dry period<br>Fountains dry out<br>Vegetables<br>damaged<br>Grain profits | <i>Item eodem anno bene per quatuor menses non venit pluvia vel nix, que balnearet terram; propter quod magna siccitas fuit, et multi putei civitatis Parme et multa flumina tam Parme, Taronis et Hencie, quam alia, magno tempore steterunt sica, et blave steterunt ad nascendum taliter quod viderentur super terram usque ad mensem aprilis; ob quod timor fuit de caristia et indigentia blave. Et fabe fuerunt totaliter arse ubique per Lombardiam, sed furmenta et alie blave satis bona et necta, Deo concedente.</i>                                           | Bonazzi 1902, p. 84                        |                                                             |
| 1303<br>Mai 6       | Parma           | Dry period<br>Processions<br>Short rain                                   | <i>Et magne processiones clericorum et laycorum circa civitatem facte fuerunt com letaneis et oracionibus et reliquiis sanctorum ad Deum pro pluvia postulanda; et tandem de mense maij, in festa beati Johannis ad Portam Latinam, pluvit per totam ipsam diem; de qua pluvia fuit magna, ymo maxima leticia fuit omnibus et ubique.</i>                                                                                                                                                                                                                                 | Bonazzi 1902, p. 84                        | From the<br>Guidoboni<br>collection                         |
| 1303<br>Jun 12      | Cividale Friuli | City fire                                                                 | <i>De igne in Civitate. Anno Domini 1303, die 12. intrante Iunio circa mediam noctem exivit ignis de domo Boni prope portam pontis Austriae Civitatis de intus versus orientem, in qua morabatur quidam Tuscus, nomine Augustinus, et combussit omnes domos domni Bernardi decani et domos domni Henrici de Prampercho cum turri, quae fuerunt domni Girardini militis et illorum de Orzono, et omnes domos ab utraque parte viae usque ad viam qua itur pusternulam sive ad molendinum, et eundo versus fratres Minores, omnes domos ab utraque parte duarum viarum,</i> | Arndt 1866 (Annales Foroiulienses), p. 210 | Probably<br>missdated to<br>1303,<br>compare<br>1304 Jun 12 |

## Supplementary Information 2: Documentary data 1300-1307

| Date                | Location | Event                                                                                  | Source quote                                                                                                                                                                                                                                                                                                                                                                                                                                                                                                                                                                                                                                                                                                                                                                                                                                                                                                                                                                                                                                                                                                                          | Taken from:                                   | Annotations |
|---------------------|----------|----------------------------------------------------------------------------------------|---------------------------------------------------------------------------------------------------------------------------------------------------------------------------------------------------------------------------------------------------------------------------------------------------------------------------------------------------------------------------------------------------------------------------------------------------------------------------------------------------------------------------------------------------------------------------------------------------------------------------------------------------------------------------------------------------------------------------------------------------------------------------------------------------------------------------------------------------------------------------------------------------------------------------------------------------------------------------------------------------------------------------------------------------------------------------------------------------------------------------------------|-----------------------------------------------|-------------|
|                     |          |                                                                                        | <i>combussit et domos domni abbatis Rosacensis, et domos fratrum Minorum cum omnibus domibus curiae sitae prope dictas domos fratrum, quae dicebatur curia domni Abbadotti.</i>                                                                                                                                                                                                                                                                                                                                                                                                                                                                                                                                                                                                                                                                                                                                                                                                                                                                                                                                                       |                                               |             |
| 1303<br>Jan-<br>Aug | Siena    | Dry period<br>Failed harvest<br>Water mills fall dry                                   | <i>E ne'l anno predetto [1303] fu sì grande el secho, che non è possibile a crederlo; e non si poteva macinare in nisuno modo, se non co' mulini a secho, ch'erano nella città; ed era sì grande la charestia del macinato, che costava più che costava el grano. E per questa charestia naque di molte inimicizie per tòrre la volta al macinare l'uno cittadino a l'altro, e andava a la volte a chi più poteva, e anco a le volte ve ne fu de' morti. E stette il mondo, cioè in queste parti, che non piove otto mesi [S. 84] E al tenpo detto di sopra si trovò per lo gran secho che era stato di dicenbre, di gienaio e di feraio, molte pere, sucine e fichi e mele e rose su gli arbori, che pareva che fusse di giugno o luglio e d'aghosto; ed era tute le machie piene di rose e di more, e ogniuno si maravigliava di tala maraviglia; le quali cose non sogliono nascere in tal tenpo. E per questo ogniuno diceva, Idio vorà mostrare qualche miracolo: e ogniuno aspettava segni dal cielo e stava giente in grande tremore, sì per la grande charestia che era stata e del gran secho e anco de' frutti apariti.</i> | Lisini/Iacometti 1939<br>(Anonimo), pp. 83-84 |             |
| 1303<br>Jan-<br>Aug | Siena    | Dry period<br>Mild winter<br>Fruit in winter<br>Failed harvest<br>Water mills fall dry | <i>Un grande asciuttore fu in quel di Siena e per lo paese che stè mesi viii che mai piove, e non nachuero i biadi, ed era grande carestia di macinato e costava quanto il grano la macinatura, che poco si macinava con aqua, che' quasi tutto si macinava a' mulini a secho: e spesso si faceva quistione per lo macinare. E a le volte si toleva la volta, chi prima avea a macinare : e alcuna volta si faceva chi più potea, e spesso ne moriva qualcuno nelle quistioni; sicche non naquero i biadi e gl[i] arbori non fruttaro, se non al</i>                                                                                                                                                                                                                                                                                                                                                                                                                                                                                                                                                                                  | Lisini/Iacometti 1939<br>(Montauri), p. 278   |             |

## Supplementary Information 2: Documentary data 1300-1307

| Date                        | Location               | Event                                                               | Source quote                                                                                                                                                                                                                                                                                                                                                                                                                                                       | Taken from:                 | Annotations                                 |
|-----------------------------|------------------------|---------------------------------------------------------------------|--------------------------------------------------------------------------------------------------------------------------------------------------------------------------------------------------------------------------------------------------------------------------------------------------------------------------------------------------------------------------------------------------------------------------------------------------------------------|-----------------------------|---------------------------------------------|
|                             |                        |                                                                     | <i>genaro si trovò che alquanti arbori fero frutto, cioè mele e sucine e fichi, e more e rose, e erano tutte le machie piene di rose e di more, e ognuno si maravigliava e la gente stava in grande tremore di paura del giuditio di Dio, sì per li frutti nasciare nel tenpo di gienao e feraio, e per lo grande asciuttore la gente stava con gran tremore di Dio; e per questo asciuttore seguì la carestia.</i>                                                |                             |                                             |
| 1303                        | Parma                  | Dry period<br>Failing harvest<br>Fountain built                     | <i>Item eodem anno, tempore estatis et ante et postea bene quasi per unum annum, non pluvit, ita quod multi putei civitatis et fontes siccati fuerunt, et blave steterunt ad nascendum usque ad mensem maij; ante quo anno metitum fuit quam segarentur prata, nisi illa que poterant adaquari [...] Item eo tempore puteus de platea com rota factus fuit pro communi in platea communis in eo loco ubi est, in quo loco jam ante fuerat alius puteus parvus.</i> | Bonazzi 1902, p. 86         | Dated to 1304 by Giovanni di Cornazano, 729 |
| 1303<br>Feb 22              | Ferrara                | Drought<br>Dearth                                                   | <i>In festo sancti Petri. Valebat sistarius frumenti solidos x bonon., et vinum etiam carissimum et hoch propter siccum etc.</i>                                                                                                                                                                                                                                                                                                                                   | Bertoni/Vicini 1908, p. 58  |                                             |
| 1303<br>Aug-<br>1304<br>May | Lucca & surroundings   | Cold period<br>Freezing water bodies<br>Dry period<br>Grain imports | <i>MCCCIII. Fue grandissimo freddo che gessòe l' Arno da Pisa e lago da Massaciuccoli, che v' andavano suso le persone. E fue grande secho che non piovè d'Agosto in fine a Maggio; e venne molto grano a Motroni.</i>                                                                                                                                                                                                                                             | Bongi 1893, p. 241          |                                             |
| 1304                        | Europe, Italy, Tuscany | Dry period<br>Dearth / famine<br>Grain imports                      | <i>Eodem anno quasi toto maxima fuit siccitas quasi in toto Occidente, sed et in Italia et precipue in Tuscia maxima fames et carestia rerum venalium inaudita. Alleviata tamen fuit in parte propter frumentum transportatum mucrone de provincia Provincie, Sardinie, Sicilie, per quod toti imperiali Tuscie est subventum.</i>                                                                                                                                 | Clavuot 2009, p. 652        |                                             |
| 1304                        | Verona<br>Trento       | Drought                                                             | <i>A. 1304 fuit maxima terrae siccitas, quia ferme per totum hunc annum pluvia de coelo non decidit. Grana frumenti coeperunt nasci mense Majo.</i>                                                                                                                                                                                                                                                                                                                | Tovazzi (18th cent.), p. 14 |                                             |



## Supplementary Information 2: Documentary data 1300-1307

| Date        | Location | Event                                        | Source quote                                                                                                                                                                                                                                                    | Taken from:                                              | Annotations                                                                                                                          |
|-------------|----------|----------------------------------------------|-----------------------------------------------------------------------------------------------------------------------------------------------------------------------------------------------------------------------------------------------------------------|----------------------------------------------------------|--------------------------------------------------------------------------------------------------------------------------------------|
| 1304        | Parma    | Drought                                      | <i>1304. Grande fu la siccità in terra, perchè quasi tutto quest' anno non fu pioggia da Cielo; e fu per la siccità de' pozzi cavato su la Piazza del Commune un grande pozzo a' bisogni della Città; e stettero le Biade a nascere fino al mese di maggio.</i> | Muratori 1728, col. 729                                  | Probably doubling the entry for 1303                                                                                                 |
| 1304        | Asti     | City fire<br><br>(maybe in military context) | <i>Dum appropinquarent portam Archus, invenerunt eam igne succensam, et introeuntes civitatem, iverunt usque in platheam illorum de Castello [...]</i>                                                                                                          | Ventura 1848, p. 744                                     | From the Guidoboni collection<br><br>In a 15th cent. rhyme chronicle (Carducci/Fiorini 1912, pp. 113-115) the same event is reported |
| 1304, Jan 9 | Verona   | Frost<br>Freezing river (Adige)              | <i>Anno 1303 die 9 Ianuarii Veronae adeo intensum fuit frigus, ut Athesis glaciatus remanserit ita ut nedum homines, sed etiam equi super ipsum sine laesione ulla potuerint currere.</i>                                                                       | Tovazzi (18th cent.), p. 97                              | From the Guidoboni collection:<br><br>Datation more veneto                                                                           |
| 1304 Jan 11 | Florenz  | Frost<br>Freezing river                      | <i>Ego Iohannes vidi quasdam personas que dicebant et dixerunt mihi: Nos transivimus odie flumen Arni super glaciem; et fuit ea die, dies veneris undecima ianuari MCCCIII.</i>                                                                                 | R. Deputazione sugli studi di storia patria 1876, p. 162 | From the Guidoboni collection<br><br>Stilus pisanus <sup>1</sup>                                                                     |

<sup>1</sup> Key argument for the use of *stilus pisanus* in San Miniato instead of *stilus florentinus* is the datation of the big city fire in Florence to June 1305, while it is beyond doubt that this event took place in 1304.

## Supplementary Information 2: Documentary data 1300-1307

| Date                   | Location | Event          | Source quote                                                                                                                                                                                                                                                                                                                                                                                                                                                                                                                                                                                                                                                                                                                                                                                                                                                                                                                                                                                                                                             | Taken from:                                    | Annotations                                                                       |
|------------------------|----------|----------------|----------------------------------------------------------------------------------------------------------------------------------------------------------------------------------------------------------------------------------------------------------------------------------------------------------------------------------------------------------------------------------------------------------------------------------------------------------------------------------------------------------------------------------------------------------------------------------------------------------------------------------------------------------------------------------------------------------------------------------------------------------------------------------------------------------------------------------------------------------------------------------------------------------------------------------------------------------------------------------------------------------------------------------------------------------|------------------------------------------------|-----------------------------------------------------------------------------------|
| 1304,<br>April-<br>Mai | Bologna  | Rain           | <i>Eodem anno, fuit maxima pluvia in Bononia, quae incepit die xxij mensis aprilis et duravit usque ad xvij diem mensi maji.</i>                                                                                                                                                                                                                                                                                                                                                                                                                                                                                                                                                                                                                                                                                                                                                                                                                                                                                                                         | Frati/Sorbelli 1902, p. 29                     |                                                                                   |
| 1304                   | Florenz  | Rain<br>Dearth | <i>In quest' anno furono grandissime et lunghe piogge per modo che le biade andaro a male per tutto, per modo che per tutta Italia per la guerra e per la pioggia questo anno valse a Firenze lo staio del grano maggior pregio che mai vi fosse valuto, ciò valse tre quarti di fiorino lo staio et più per tutto.</i>                                                                                                                                                                                                                                                                                                                                                                                                                                                                                                                                                                                                                                                                                                                                  | Rodolico 1903, p. 89                           | From the<br>Guidoboni<br>collection<br><br>Dated in<br>Florentin<br>style to 1303 |
| 1304,<br>Jun           | Florenz  | City fire      | <i>In questo tenpo di giugno in Fiorenza s'aprese el fuoco e arsero più di mille case in Calimala infino a orto Sa' Michele in mercato vecchio, e allora u[s]cìro e' Cavalcanti e gli Abati di Fiorenza e molti popolareschi e andorone in verso la parte bianca.</i>                                                                                                                                                                                                                                                                                                                                                                                                                                                                                                                                                                                                                                                                                                                                                                                    | Lisini/Iacometti 1939 (Montauri), pp. 314-315  | From the<br>Guidoboni<br>collection                                               |
| 1304<br>Jun            | Florenz  | City fire      | <i>E com'erano sul fiorire e vincere e in più parti de la terra ove si combattea i loro nimici, avvenne come piaque a Dio, o per fugire maggior male o per punire i peccati de' Fiorentini, che uno ser Neri Abati, cherico e priore di San Piero Scheragio, omo moderno e disoluto e ribello e nimico di suoi consorti, con fuoco tenperato in prima misse fuoco in casa suoi consorti in Orto Sa' Michele e poi in Calimala fiorentina e. in casa Caponsanchi presso' a la bocha di Mercato Vechio, e fu sì inpeto e furioso il maledetto fuoco col vento che traeva forte, che in quello giorno arse la casa gl[i] Abati e de' Macchi e tutta la loggia d'Orto Sa' Michele e casa degl[i] Amieri e Toschi e Cipriani e Lanberti e Bachini e Buiamonti e tutta Calimala, e le case de' Cavalcanti e tutto intorno Mercato Vechio e Santa Cicilia e tutta la ruga di porta Sante Marie infino a Ponte Vechio e Vachereccia, e dietro a San Piero Scheragio e le case de' Gherardini e de' Pulci e Amidei e di tutte le vicinanze a' luoghi nominati</i> | Lisini/Iacometti 1939 (Agnolo di Tura), p. 282 |                                                                                   |

## Supplementary Information 2: Documentary data 1300-1307

| Date            | Location           | Event     | Source quote                                                                                                                                                                                                                                                                                                                                                                                                                                                                                                                                                                                                                                                                                                                                                                                                    | Taken from:                                              | Annotations                                                                                                               |
|-----------------|--------------------|-----------|-----------------------------------------------------------------------------------------------------------------------------------------------------------------------------------------------------------------------------------------------------------------------------------------------------------------------------------------------------------------------------------------------------------------------------------------------------------------------------------------------------------------------------------------------------------------------------------------------------------------------------------------------------------------------------------------------------------------------------------------------------------------------------------------------------------------|----------------------------------------------------------|---------------------------------------------------------------------------------------------------------------------------|
|                 |                    |           | <i>quasi infino ad Arno : e insoma arse il midollo e tuorlo di Firenze e furono in quantità tra palazi e to[r]ri e case, più di mille settecento.</i>                                                                                                                                                                                                                                                                                                                                                                                                                                                                                                                                                                                                                                                           |                                                          |                                                                                                                           |
| 1304<br>Jun 12  | Firenze            | City fire | <i>Civitas Florentie combursit, ut dicebatur, in quantitate domorum duarum milium sub anno suprascripto [1305] et indictione, de mense iunii quasi die XII.</i>                                                                                                                                                                                                                                                                                                                                                                                                                                                                                                                                                                                                                                                 | R. Deputazione sugli studi di storia patria 1876, p. 164 | Stilus pisanus, hence read 1304 instead of 1305                                                                           |
| 1304            | Firenze            | City fire | <i>Come la città di Firenze era in queste divisioni de' Bianchi e Neri, una maladetta parte un dì si levò in Firenze, infra i quali furono Popolani e Grandi delle maggiori famiglie di Firenze e quasi i migliori. [...] e vinti i Cerchi, li Giugni ed i Medici li cacciarono infino in Mercato Vecchio; e se non fosse fuoco che fu messo, senza dubbio il dì sarebbero stati cacciati i Neri di Firenze. De' quali mali non so qual si fusse stato il minore, perochè ad un tratto fu messo fuoco in tre luoghi.</i>                                                                                                                                                                                                                                                                                        | Rodolico 1903, p. 92                                     |                                                                                                                           |
| 1304,<br>Jun 12 | Cividale de Friuli | City fire | <i>De igne in Civitate Austria ad portam Pontis. Edome anno [1304], die XII intrante junio, circa mediam noctem exivit ignis de domo Boni prope portam Pontis Austrie Civitatis de intus versus orientem, in qua morabatur quidam Tuscus, nomine Augustinus, et combussit omnes domos domni Bernardi decani et domos domni Henrici de Prampercho cum turri, quae fuerunt domni Girardini militis et illorum de Orzono, et omnes domos ab utraque parte viae usque ad viam qua itur pusternulam sive ad molendinum, et eundo versus fratres Minores, omnes domos ab utraque parte duarum viarum, combussit et domos domni abbatis Rosacensis, et domos fratrum Minorum cum omnibus domibus curiae sitae prope dictas domos fratrum, quae dicebatur curia domni Abbadotti, quod quasi est impossibile dicere.</i> | Tambara 1906, p. 33                                      | From the Guidoboni collection<br><br>Dated to 1303 in Arndt 1866, but probably wrong in the context of the next paragraph |

## Supplementary Information 2: Documentary data 1300-1307

| Date                            | Location    | Event                             | Source quote                                                                                                                                                                                                                                                                                                                                                                                                                                                                                                                                                                                                                                                                                                                                                                    | Taken from:                                              | Annotations                                                                        |
|---------------------------------|-------------|-----------------------------------|---------------------------------------------------------------------------------------------------------------------------------------------------------------------------------------------------------------------------------------------------------------------------------------------------------------------------------------------------------------------------------------------------------------------------------------------------------------------------------------------------------------------------------------------------------------------------------------------------------------------------------------------------------------------------------------------------------------------------------------------------------------------------------|----------------------------------------------------------|------------------------------------------------------------------------------------|
| 1304<br>Sep 29                  | Tuscany     | Flooding<br>Astrometeorology      | <i>Istem eodem anno fuit coniunctio planetarum cum sole in festo beati Michaelis in septembri sole existente in XV.c libre. Planete vero, qui coniuncti erant cum sole, fuerunt Luna, Saturnus, Iuppiter et Mercurius. Mars etiam fuit eius socius - alias propinquus - quasi in medio virginis et Venus in fine. Ex quo multi effectus secuti sunt mali: Primo quia in Tuscia et aliis locis tanta aggenerata - alias generata - est aquarum inundatio, ut quasi quedam particularis alluvio videretur esse in interioribus aquis terre. Unde omnes fontes in partibus Tuscie superexcreverunt ultra solitum cursum nature, ita ut populus absorberetur timore. Propter quam causam populi ex timore ad ecclesiam recurrerant pro Dei misericordia impetranda et exoranda.</i> | Clavuot 2009, p. 655                                     | GB                                                                                 |
| 1305                            | Bologna     | Flood                             | <i>El dito anno cresce fiume reno si forte che rueno uno fas pezo del Saso da glosaria gloromito.</i>                                                                                                                                                                                                                                                                                                                                                                                                                                                                                                                                                                                                                                                                           | Ronco, G. (15 <sup>th</sup> cent.), fol. 317v            |                                                                                    |
| 1305                            | Bologna     | Flood                             | <i>Nel detto anno, cresi si grandemente il fiume de Rem, che ruvinò un pezo del saso della Ghiesia, com lo Romito</i>                                                                                                                                                                                                                                                                                                                                                                                                                                                                                                                                                                                                                                                           | Anonymus (16th cent.), ad. ann. 1305                     |                                                                                    |
| 1305<br>Jan 1                   | San Miniato | Warm winter                       | <i>Ego Iohannes vidi sub anno et indictione predictis, die prima mensis ianuarii, cerasam maturam quam habebat in manibus quidam infans Pilastre.</i>                                                                                                                                                                                                                                                                                                                                                                                                                                                                                                                                                                                                                           | R. Deputazione sugli studi di storia patria 1876, p. 165 | Stilus pisanus                                                                     |
| 1305,<br>Feb 3 –<br>15<br>April | Friuli      | Strong snowfall<br>Damaged houses | <i>De nive grandi. Anno praescripto, in festo beati Blasii, incepit ningere in Citivate et fuit illa nix tam magna, quod non fuit homo qui dixisset, se unquam vidisse in Foroiulii ita magnam. Et fecit damnum valde grande de arboribus et specialiter pomiferis, et diruit plures domos et specialiter in Tulmino destruxit villas et domos quam plures; ubi mortui sunt homines et bestiae satis multae. Quae nix duravit in Civitate bene quindecim diebus in Aprili.</i>                                                                                                                                                                                                                                                                                                  | Arndt 1866 (Annales Foroiulienses), p. 211               | From the Guidoboni collection<br><br>Almost similar account by Tambara 1906, p. 33 |
| 1305<br>Feb 3                   | San Miniato | Strong snowfall                   | <i>Die mercurii tertia februarii, in festo sancti Blasii. Ninxit hoc anno et hoc die magna quantitas nivis, et postea pluribus vicibus de dicto mense februarii ninxit: ita quod</i>                                                                                                                                                                                                                                                                                                                                                                                                                                                                                                                                                                                            | R. Deputazione sugli studi di storia patria 1876, p. 165 |                                                                                    |

## Supplementary Information 2: Documentary data 1300-1307

| Date           | Location      | Event            | Source quote                                                                                                                                                                                                                                                                                                                                                                                                                                                                                                                                                                                | Taken from:                               | Annotations                                      |
|----------------|---------------|------------------|---------------------------------------------------------------------------------------------------------------------------------------------------------------------------------------------------------------------------------------------------------------------------------------------------------------------------------------------------------------------------------------------------------------------------------------------------------------------------------------------------------------------------------------------------------------------------------------------|-------------------------------------------|--------------------------------------------------|
|                |               |                  | <i>homines dicebant fere omnes, hec ... quam usquam alia que fuerit a XX annis citra.</i>                                                                                                                                                                                                                                                                                                                                                                                                                                                                                                   |                                           |                                                  |
| 1305<br>Feb 20 | Subiaco       | Rain<br>Flood    | <i>Anno Domini Millesimo Trecentesimo Quinto, Sede vacante post Domini Benedicti Paper Undecimi mortem, mense Februarii, XX. die hujus mensis, ex diluvio fracta prata cum ponte minimo, per quem itur ad Sanctum Laurentium, occasione diluvii, &amp; eadem die corruerunt molendini cum sedilibus suis, &amp; muris circumstantibus. Et sic locus Monasterii ad nihilum redactus, quia duo monachi levaverunt duos lapides, qui fuerunt firmati cum aliis petris; &amp; sic aqua destruxit.</i>                                                                                           | Muratori 1741, col. 1070                  | From the Guidoboni collection                    |
| 1305<br>Mai    | Bologna       | Rain<br>Flood    | <i>Eodem anno, de mense maji. - Pluit continuo duobus diebus et duabus noctibus, qua de causa Navigium inundavit domos Sancti Felicis et una pars Sassi Grosinae ruit ita quod occidit heremitam qui ibi habitabat.</i>                                                                                                                                                                                                                                                                                                                                                                     | Frati/Sorbelli 1902, p. 29                |                                                  |
| 1305<br>Jul    | Gonzaga       | Rain<br>Flood    | <i>Mantuani, Veronenses, Brissinenses equitaverunt eodem die Goncagam: set propter multitudinem pluviarum et aquarum, non potuerunt cum exercitu stare.</i>                                                                                                                                                                                                                                                                                                                                                                                                                                 | Bertoni/Vicini 1908, pp. 61-62            | From the Guidoboni collection                    |
| 1305<br>Oct    | Nonantola     | Continuous rain  | <i>Item predictae anno de mense otubris illi de quarterio prote Ravenatis et Sancti Proculi iverunt ad pontem sancti Anbroxii et eum per vin ceperunt: iverunt circha civitatem Mutine ea die in sero redierunt ad dictum pontem ibi ospitando et in mane incixaturi sancti Ambroxii de tenplo et concremata igne et guarnito ponte iverunt et chastramentati sunt circha castrum Nonantule, et ibi cum armis et eam obsidendo steterunt per XV dies et per [S. 270] continuam aquam et pluviam et malum tenpus seperaverunt se et Castrum Novum fecerunt isuta pontem sancti Anbroxii.</i> | Sorbelli 1938: Cronaca Vill., pp. 269-270 | Almost similar: Sorbelli 1938, Cronaca B, p. 269 |
| 1305<br>Oct    | Reggio Emilia | Rain<br>Cold (?) | <i>Item etiam de dicto mense octubris iterato dominus Ghibertus com militibus et soldatis Parme, et com populo sancte Christine et porte Nove, com duobus milibus</i>                                                                                                                                                                                                                                                                                                                                                                                                                       | Bonazzi 1902, p. 92                       |                                                  |

## Supplementary Information 2: Documentary data 1300-1307

| Date                 | Location                      | Event                                              | Source quote                                                                                                                                                                                                                                                                                                                                                                                                                                                                                                                                                           | Taken from:                      | Annotations                         |
|----------------------|-------------------------------|----------------------------------------------------|------------------------------------------------------------------------------------------------------------------------------------------------------------------------------------------------------------------------------------------------------------------------------------------------------------------------------------------------------------------------------------------------------------------------------------------------------------------------------------------------------------------------------------------------------------------------|----------------------------------|-------------------------------------|
|                      |                               |                                                    | <i>hominibus porte de Parme et porte Benedicte, equitavit seu equitaverunt et castramenti sunt ad Casamdei, Calernum et Gaydam, proponentes se nomquam movere donec haberent Regium, et equitantes omni die usque ad civitatem, et intrantes burgos circumquaque, nulum dampnum alicui inferentes; sed tempus hyems et pluvia non permisit, et sic steterunt ibi per XV dies, et redierunt Parmam.</i>                                                                                                                                                                 |                                  |                                     |
| 1306,<br>Jan-<br>Feb | Parma,<br>Lombardei<br>Modena | Cold<br>Freezing rivers<br>Rain<br>Wind            | <i>Item eodem tempore de mense januarij per tredecim dies continuos fuit arduum et inmensum frigus, magis quam aliquis recordaretur, ita quod flumina omnia, vales, fovee omnes indifferenter et in omnibus partibus Lombardie congelaverunt, et flumen Paudi in pluribus partibus congelavit, seu congelatum fuit, taliter quod super glaciem multe persone transiverunt ipsum, et naves vix transire poterant.</i>                                                                                                                                                   | Bonazzi 1902, p. 94              | From the<br>Guidoboni<br>collection |
| 1306                 | Verona                        | Frost<br>Freezing rivers                           | <i>A. 1306 fuit frigus maximum, ac perniciosissimum territorio Veronensi; visique sunt duo soles.</i>                                                                                                                                                                                                                                                                                                                                                                                                                                                                  | Tovazzi (18th cent.), p. 14      | From the<br>Guidoboni<br>collection |
| 1306<br>Feb-<br>Mrz  | Lucca,<br>Toskana             | Snowfall<br>Rain<br>Wind<br>Agricultural<br>impact | <i>Eodem anno, videlicet in principio Februarii fuit coniunctio Martis cum Saturno postquam coniunctionem, que fuit in principio libre. Secute sunt nives ultra modum regionis, et ter facte sunt alte supra modum, quales nunquam fuerunt in montibus illis vise, precipue in tempore illo. Post nives vero et tempora inordinata in toto februario et quasi in tota lunatione martii ventorum et aquarum love existente retrogrado in fine virginis. Propter que omnia poma aromatica sicut citra et arancia et scopice item oliveta et ficeta quasi defecerunt.</i> | Clavuot 2009, 656                | From the<br>Guidoboni<br>collection |
| 1306<br>Mar (?)      | Bologna                       | Snowfall                                           | <i>Per la quale novella se fece grande luminaria tuta una nocte in suso la torre degli Asenelli, et uno huomo andoe con doe stanghe suso la dicta torre et apiglio el fuoco in</i>                                                                                                                                                                                                                                                                                                                                                                                     | Sorbelli 1938, Cronaca B, p. 273 |                                     |

## Supplementary Information 2: Documentary data 1300-1307

| Date            | Location      | Event                                       | Source quote                                                                                                                                                                                                                                                                                                                                                                                                                                                                                                                                                                                                                                      | Taken from:                                              | Annotations                                                          |
|-----------------|---------------|---------------------------------------------|---------------------------------------------------------------------------------------------------------------------------------------------------------------------------------------------------------------------------------------------------------------------------------------------------------------------------------------------------------------------------------------------------------------------------------------------------------------------------------------------------------------------------------------------------------------------------------------------------------------------------------------------------|----------------------------------------------------------|----------------------------------------------------------------------|
|                 |               |                                             | <i>cima della torre, et ive stette tuta quella nocte, e nevoe molto forto.</i>                                                                                                                                                                                                                                                                                                                                                                                                                                                                                                                                                                    |                                                          |                                                                      |
| 1306,<br>Oct 30 | Civiale       | Hail                                        | <i>De grandi tempestate in autumno. Anno Domini 1306, die penultimo Octobris fuit in Civitate magna tempestas in crepusculo, ita magna ut nuces et in die sequenti in aliquibus locis poterant colligi cum conchis per vias, et destruxit hortos et pergularum uvas quae solebant serviri tempore illo; et fecit magnum damnum.</i>                                                                                                                                                                                                                                                                                                               | Arndt 1866 (Annales Foroiulienses), p. 214               | From the Guidoboni collection<br><br>Identical with Tambara 1906, 39 |
| 1307<br>Jan     | San Miniato   | Rain<br>Flooding                            | <i>In hyeme fuit magna pluvia; et ipso anno, de mense ianuarii, cecidit pons lapidum qui erat super flumen Else, loco dicto alla Torrebeni.</i>                                                                                                                                                                                                                                                                                                                                                                                                                                                                                                   | R. Deputazione sugli studi di storia patria 1876, p. 170 |                                                                      |
| 1307<br>Jan     | Lucca         | Flooding<br>Wind<br>Hail                    | <i>Anno Domini MCCCVII in ianuario facta est coniunctio Martis cum Saturno in scorpione, et secuta est postea magna aquarum inundatio. Sed in medio februarii sole intrante signum piscium et luna signum cancri, love vero et Saturno et Marte in medio signo scorpionis maior facta est alluvio cum magna intemperie aeris ventorum, grandinum et aquarum.</i>                                                                                                                                                                                                                                                                                  | Clavuot 2009, p. 659                                     | From the Guidoboni collection                                        |
| 1307<br>Jul 19  | Roncarolo, PC | Drought<br>Heat<br>Impact on military units | <i>Et tandem die mercurij sequenti, jam facta magna hora, venerunt, et non in magna quantitate, et sic omnes Parmenses et Placentini iverunt ad dictum locum Roncaroli; sed ibi nichil fuerunt, ymo multi, ex immenso et intenso calore, qui tunc erat, et ex defectu aque, quia locus est totus campania, multi fuerunt in periculo mortis, ita quod, sine aliud facere, oportuit eis recedere de neccesitate et venire Florencolam; et multi de Placentinis ex calore et labore defecerunt et mortui sunt tam de populo quam de militibus; gratias autem Deo, nuli ex Parmensibus remanserunt, sed ex predictis causis multi et quasi omnes</i> | Bonazzi 1902, p. 99                                      | From the Guidoboni collection                                        |

## Supplementary Information 2: Documentary data 1300-1307

| Date                  | Location                             | Event                             | Source quote                                                                                                                                                                                                                                                                                                                                                                                                                                                                                                                                                                                                                                                                                                                                                                                                                            | Taken from:                                    | Annotations                         |
|-----------------------|--------------------------------------|-----------------------------------|-----------------------------------------------------------------------------------------------------------------------------------------------------------------------------------------------------------------------------------------------------------------------------------------------------------------------------------------------------------------------------------------------------------------------------------------------------------------------------------------------------------------------------------------------------------------------------------------------------------------------------------------------------------------------------------------------------------------------------------------------------------------------------------------------------------------------------------------|------------------------------------------------|-------------------------------------|
|                       |                                      |                                   | <i>fuert in maximo periculo calor is et sitis et debilitatis, et multi equi magagnati similiter ibi fuerunt.</i>                                                                                                                                                                                                                                                                                                                                                                                                                                                                                                                                                                                                                                                                                                                        |                                                |                                     |
| 1307<br>Sep 17        | Siena                                | City fire<br>Fire guard           | <i>Fuoco grandissimo s'aprese in Siena nel terzo di Sa' Martino e popolo di Sa' Martino nel chiasso de' bullettari, e prima fu in casa di Maffeo granaiuolo, el quale avea sotto la sua casa uno maestro bullettario; el fuoco s'atacò a la fuligine, per modo che, prima ch'e' maestri vi traessero a spegnarlo, arse tre case e sei buttighe de' bullettari; e trassevi molta gente e massime i maestri di legname e di pietra, che ve ne fu 164 a spegnare detto fuoco: erano salariati dal comuno. E fé' dano el detto fuoco a 29 case di più persone. El comuno di Siena de' a quelle persone, che riceverò danno, libre 240 e anco pagò el comuno 1500 coppi che si ruppero per recare aqua a spegnare detto fuoco; e pagò ancora a quelli che recoro l'aqua lire 140; fu questo fuoco di settenbre a dì 17 domenica a notte.</i> | Lisini/Iacometti 1939 (Agnolo di Tura), p. 297 |                                     |
| 1307,<br>Sep/<br>Oct  | Dozza                                | Rain                              | <i>E stati alquant zurni nel dicto assedio, e non possendo fare alcuna cosa per la grande pioza, levarono campo e andarono a Castello Sancto Pietro adì xiiii de ottobre.</i>                                                                                                                                                                                                                                                                                                                                                                                                                                                                                                                                                                                                                                                           | Sorbelli 1939, Cron. B, p. 290                 | From the<br>Guidoboni<br>collection |
| 1307,<br>Oct 7-<br>16 | Parma &<br>surroundings;<br>Lombardy | Flood<br>Infrastructure<br>damage | <i>Item eodem tempore die sabati septimo octubris, juxta sero et in nocte sequenti, flumina civitatis Parme et districtus creverunt et venerunt sic magna quod, ut dicebatur a senioribus, nomquam sic fuerant; et flumen Parme ita crevit quod fuit super mercatum et implevit omnes domos burgo Pellacanorum et de domo de Caghonis et de Macalis et totam illam contratam et de sancto Bernabeo de retro ecclesiam, et in Capite Pontis omnes domos de burgo desuptus et de sancto Spiritu, de sancta Maria Nova, et domos fratrum Humiliatorum et domum fratrum de Martorano; et in ipsa contrata fuit Parma sic magna, quod fuit desuper toltas puteorum contrate, ita quod puteos implevit; et similiter de sancta Cecilia, de sancta Maria</i>                                                                                   | Bonazzi 1902, p. 102                           |                                     |



## Supplementary Information 2: Documentary data 1300-1307

| Date | Location | Event | Source quote                                                                                                                                                                                                                                                                                                                                                                                                                                                                                                                                                                                                 | Taken from: | Annotations |
|------|----------|-------|--------------------------------------------------------------------------------------------------------------------------------------------------------------------------------------------------------------------------------------------------------------------------------------------------------------------------------------------------------------------------------------------------------------------------------------------------------------------------------------------------------------------------------------------------------------------------------------------------------------|-------------|-------------|
|      |          |       | <p><i>Templi, et in vicinia omnium Sanctorum, sancte Marie burgi Tascherij et sancti Baxilidis et de hospitale Rodulfi, ita quod poterat navigari.</i></p> <p><i>Item eo tempore Parmenses incepterunt facere fieri unum pontem in Pauda ad terram Berxili, et pro maiori parte ipsum fecerunt; sed non fuit completus, immo Paudum ipsum diripuit et destruxit quod erat factum [...] Item eo mense, die lune xvj octubris, flumina civitatis et episcopatus, ut dictum est, iterator similiter creverunt et fecerunt similiter; ut dictum est quod per totam Lombardiam flumina sic magna fuerunt.</i></p> |             |             |

## Bibliography of cited source editions:

Anonymus (16th cent.): Fragmenti di Storia Bolognese diverse di diverse anni, in: Bologna, Biblioteca dell' Archiginnasio, BA Gozzadini 61, n. 9.

Arndt, W. (ed.): Annales Foroiulienses a. 1252-1331 , in: MGH Scriptores 19, Hahn'sche Buchhandlung, Hannover, 1866, pp. 194-222

Arndt, W. (ed.): Annales Wratislavienses antiqui, in: Monumenta Germaniae Historica Scriptores (in folio) 19, edited by Pertz, G. H., Hahnsche Buchhandlung, Hannover, 527-529, 1866.

Baethgen, E. (ed.): Chronik Johannis von Winterthur, in: Monumenta Germaniae Historica Scriptores rerum Germanicarum N.S. 3, Weidmannsche Buchhandlung, Berlin, 1924.

Bertoni, G./Vicini, E P. (eds.): Chronicon Estense cum additamentis usque ad annum 1478, (Rerum Italicarum Scriptores, 15,3), S. Lapi, Città di Castello, 1908.

Bielowski, A. (ed.): Annales Lubenses, in: Monumenta Poloniae historica 3, Gubrynowicz i Schmidt, Lwow, 707-708, 1878. (= Bielowski 1878b).

Bielowski, A. (ed.): Annales poloniae minoris, in: Monumenta Poloniae historica 3, Gubrynowicz i Schmidt, Lwow, 135-202, 1878. (= Bielowski 1878a).

Bonazzi, Giuliano (ed.): Chronicon Parmense. Ab Anno MXXXVIII usque ad Annum MCCCXXXVIII, (Rerum Italicarum Scriptores, 9/9), S. Lapi, Città di Castello, 1902.

Bongi, S. (ed.): Antica cronichetta volgare Lucchese già della Biblioteca di F. M. Fiorentini. Cod. VI, Pluteo VIII, in: *Atti della reale Accademia Lucchese di Scienze, Lettere ed Arti* 26 (1893), pp. 217-254.

Bouquet, M. (ed.. )Jean de Saint-Victor, Experta e Memoriale historiarum, in: Recueil Des Historiens Des Gaules Et De La France, 21, Paris, 1855.

Buchon, J.A. (ed.): Chronique metrique de Godefroy de Paris, suivie de la taille de Paris en 1313, in: Collection des chroniques nationales françaises IX, Verdière, Paris, 1827.

Cardanus, H. and Schröder, C. (eds.): Cölner Jahrbücher, in: Die Chroniken der niederrheinischen Städte. Cöln, 2, Die Chroniken der deutschen Städte vom 14. bis in's 16. Jahrhundert 13, edited by Cardanus, H., Hirzel, Leipzig, 18-192, 1876.

Carducci, G./Fiorini, V. (eds.): Antoni Astesani De eius vita et fortuna varietate Carmen [AA. 380-1341], (Rerum Italicarum Scriptores, 14,1), S. Lapi, Città di Castello, 1912.

Clavuot, O. (ed.): Tholomeus von Lucca. Historia ecclesiastica nova. nebst Fortsetzungen bis 1329, (MGH Scriptores, 39), Hahn'sche Buchhandlung, Hannover, 2009.

Daunou, M. (ed.): Chronique latine de Guillaume de Nangis. Continuatio chronici Guillelmi de Nangiaco, in: Recueil Des Historiens Des Gaules Et De La France, 20, 543–582, Paris, 1840.

Eckertz, G. (ed.): Chronicon Brunwylarensis, in: Fontes adhuc inediti rerum Rhenanarum. Niederrheinische Chroniken 2, Heberle, Köln, 139-325, 1870.

Emler, J. (ed.): Chronicon Aulae Regiae, in: Fontes rerum Bohemicarum 4, Palackého, Praha, 1-337, 1884. (= Emler 1884a)

Emler, J. (ed.): Chronicon Benessii de Weitmil, in: Fontes rerum Bohemicarum 4, Palackého, Praha, 459-548, 1884. (= Emler 1884c)

Emler, J. (ed.): Chronicon Francisci Pragensis, in: Fontes rerum Bohemicarum 4, Palackého, Praha, 347-456, 1884. (= Emler 1884b)

Emler, J. (ed.): Kronika Neplachova, in: Fontes rerum Bohemicarum 3, Palackého, Praha, 451-484, 1882.

Fant, E. M. (ed.): Diarium Minoritarum Wisbyensium ab a. 686 ad a. 1525, in: Scriptores rerum Suecicarum I, Zeipel et Palmblad, Upsala, 32-39, 1818.

Frati, L./Sorbelli, A. (eds.): Memoriale Historicum de rebus Bononiensium (Rerum Italicarum Scriptores, 18,2), S. Lapi, Città di Castello, 1902.

Froning, R. (ed.): Annales Francofurtani, in: Frankfurter Chroniken und annalistische Aufzeichnungen des Mittelalters, Quellen zur Frankfurter Geschichte 1, Verlag Carl Jügel, Frankfurt, 1-3, 1884.

Holder-Egger, O. (ed.): Chronici Saxonici Continuatio (Thuringica) Erfordensis, in: Monumenta Germaniae Historica Scriptores rerum Germanicarum 42, Hahnsche Buchhandlung, Hannover/Leipzig, 443-485, 1899 (= Holder-Egger 1899b).

Holder-Egger, O. (ed.): Cronica S. Petri Erfordensis moderna, in: Monumenta Germaniae Historica Scriptores rerum Germanicarum 42, Hahnsche Buchhandlung, Hannover/Leipzig, 117-369, 1899 (= Holder-Egger 1899a).

Jaffé, P. (ed.): *Annales Basilienses et Colmarienses maiores*, a. 1266-1305, in: *Monumenta Germaniae Historica, Scriptores (in folio) 17*, edited by Pertz, G.H., Hahnsche Buchhandlung, Hannover, 189-232, 1861.

Langebek, J. (ed.): *Annales Islandorum regii*, in: *Scriptorum rerum danicarum medii aevi 3*, Godiche, Copenhagen, 1-139, 1774.

Lisini, A./Iacometti, F. (eds.): *Cronaca Senese conosciuta sotto il nome di Paolo di Tommaso Montauri*, in: *Cronache senesi*, vol. 1 , (Rerum Italicarum Scriptores, 15,6:1, Zanichelli, Bologna, 1939, pp. 253-564.

Lisini, A./Iacometti, F. (eds.): *Cronache senese attribuita ad Agnolo di Tura del Grasso detta la Cronica Maggiore*, in: *Cronache senesi*, vol. 1 , (Rerum Italicarum Scriptores, 15,6:1, Zanichelli, Bologna, 1939, pp. 173-252.

Lisini, A./Iacometti, F. (eds.): *Cronaca senese dei fatti riguardanti la città e il suo territorio di autore anonimo del secolo XIV*, in: *Cronache senesi*, vol. 1 , (Rerum Italicarum Scriptores, 15,6:1, Zanichelli, Bologna, 1939, pp. 41-164.

Michell, R. and Forbes, N. (transl.): *The chronicle of Novgorod 1016-1471*, Camden third series 25, Offices of the Society, London, 1914.

Muratori, L.A. (ed.): *Chronicon Sublacense sive Catalogus abbatum monasterii sublacensis*, in: *Antiquitates italicae medii aevi Vol. 4*, Societas Palatina, Milano, 1741, cols. 1037-1074.

Muratori, L.A. (ed.): *Giovanni di Cornazano. Chronica extracta et abbreviata [Istoria di Parma]*, in: *Rerum Italicarum Scriptores. Tomus duodecimus*, (RIS 12), Societas Palatina, Milano, 1728, cols. 729-754.

Pertz, G. H. (ed.): *Annales Veterocellenses*, in: *Monumenta Germaniae Historica Scriptores (in folio) 16*, Hahnsche Buchhandlung, Hannover, 41-47, 1859.

Pertz, G. H. (ed.): *Annales Ensdorfenses*, in: *Monumenta Germaniae Historica Scriptores (in folio) 10*, Hahnsche Buchhandlung, Hannover, 4-8, 1852.

Pertz, G. H. (ed.): *Annales Moguntinenses*, in: *Monumenta Germaniae Historica Scriptores (in folio) 17*, Hahnsche Buchhandlung, Hannover, 1-3, 1861.

Pez, H. (ed.): *Anonymi Leobensis Chronicon*, in: *Scriptores rerum Austriacarum veteres ac genuini 1*, Gleditsch, Leipzig, 755-968, 1721.

Porta, G. (ed): *Giovanni Villani, Nuova Cronica*, 3 vols., Fondazione Pietro Bembo, Parma, 1990.

R. Deputazione sugli studi di storia patria (ed.): Diario di ser Giovanni di Lemmo da comagnori dal 1299 al 1320, in: Cronache dei secoli XIII e XIV (Documenti di storia italiana), G. P. Vissieux, Firenze, 1876, pp. 155-206.

Rodolico, N. (ed.): Marchionne di Coppo Stefani. Cronaca fiorentina (Rerum Italicarum Scriptores, 30,1), S. Lapi, Città di Castello, 1903.

Ronco, R (15th cent.): Compendio della storia della città di Bologna, in: Bologna, Biblioteca Universitaria, BU 1124, n. 9, fols. 304r-327v.

Sorbelli, A. (ed.): Corpus Chronicorum Bononiensium. Testo delle Croniche – Volume secondo, S. Lapi, Città di Castello, 1938.

Tambara, G. (ed.): Chronica, Epitome di Cividale, in: Giuliano Canonico, Civitatensis Chronica (aa. 1252-1364) (Rerum Italicarum Scriptores, 24,14), S. Lapi, Città di Castello, 1906.

Ventura, G. (ed.): Memoriale Gvilielmi Ventvrae civis Astensis de gestis civium Astensium et plurium aliorum, in: Monumenta Historiae Patriae, *Scriptores*. Tomus III, Tipografia Regia, Torino, 1848, cols. 701-816

Wattenbach, W. (ed.): Annales canonicae S. Floriani attributi, in: Monumenta Germaniae Historica, Scriptores (in folio) 9, edited by Pertz, G.H., Hahnsche Buchhandlung, Hannover, 747-753, 1851. (= Wattenbach 1851c)

Wattenbach, W. (ed.): Continuatio Sancrucensis III a. 1302-1310, in: Monumenta Germaniae Historica, Scriptores (in folio) 9, edited by Pertz, G.H., Hahnsche Buchhandlung, Hannover, 732-735, 1851. (= Wattenbach 1851b)

Wattenbach, W. (ed.): Continuatio Zwetlensis III. a. 1241-1329, in: Monumenta Germaniae Historica, Scriptores (in folio) 9, edited by Pertz, G.H., Hahnsche Buchhandlung, Hannover, 654-669, 1851. (= Wattenbach 1851a)

Zahn, J. v. (ed.): Anonymi Leobensis Chronicon, Leuschner & Lubensky, Grätz, 1865.
